# Supplementary material for: Murine trophoblast-derived and pregnancy-associated exosome-enriched extracellular vesicle microRNAs: Implications for placenta driven effects on maternal physiology
Source: PubMed Central journal article supplement (PMC6366741; doi:10.1371/journal.pone.0210675), 2019-02-07
Supplement: pone.0210675.s009.pdf [file pone.0210675.s009.pdf]

**Table S3. KEGG Pathways Predicted to be Targeted by X-Chromosome Cluster MicroRNAs**

| <b>KEGG Pathway</b>                     | <b>Count</b> | <b>%</b> | <b>P-value</b> |
|-----------------------------------------|--------------|----------|----------------|
| Pathways in cancer                      | 38           | 4.49     | 2.44E-09       |
| Melanoma                                | 15           | 1.77     | 4.99E-07       |
| Focal adhesion                          | 24           | 2.84     | 2.64E-06       |
| Wnt signaling pathway                   | 20           | 2.36     | 5.21E-06       |
| Axon guidance                           | 18           | 2.13     | 1.31E-05       |
| Prostate cancer                         | 14           | 1.65     | 4.52E-05       |
| Neurotrophin signaling pathway          | 16           | 1.89     | 1.68E-04       |
| Non-small cell lung cancer              | 10           | 1.18     | 2.27E-04       |
| Pancreatic cancer                       | 11           | 1.30     | 4.78E-04       |
| Cell cycle                              | 15           | 1.77     | 4.83E-04       |
| Colorectal cancer                       | 12           | 1.42     | 5.19E-04       |
| MAPK signaling pathway                  | 23           | 2.72     | 7.06E-04       |
| Chronic myeloid leukemia                | 11           | 1.30     | 7.41E-04       |
| Glioma                                  | 10           | 1.18     | 8.35E-04       |
| Renal cell carcinoma                    | 10           | 1.18     | 0.001604307    |
| Small cell lung cancer                  | 11           | 1.30     | 0.001780412    |
| Progesterone-mediated oocyte maturation | 11           | 1.30     | 0.001780412    |
| Endometrial cancer                      | 8            | 0.95     | 0.004049041    |
| Hedgehog signaling pathway              | 8            | 0.95     | 0.005013717    |
| Oocyte meiosis                          | 12           | 1.42     | 0.005523078    |
| p53 signaling pathway                   | 9            | 1.06     | 0.005524583    |
| T cell receptor signaling pathway       | 12           | 1.42     | 0.006696641    |
| Acute myeloid leukemia                  | 8            | 0.95     | 0.0067723      |
| ErbB signaling pathway                  | 10           | 1.18     | 0.007080809    |
| Long-term depression                    | 9            | 1.06     | 0.00714702     |
| Ubiquitin mediated proteolysis          | 13           | 1.54     | 0.00727529     |
| mTOR signaling pathway                  | 7            | 0.83     | 0.01897059     |
| Insulin signaling pathway               | 12           | 1.42     | 0.020238377    |
| TGF-beta signaling pathway              | 9            | 1.06     | 0.021088161    |
| Bladder cancer                          | 6            | 0.71     | 0.023937777    |
| Thyroid cancer                          | 5            | 0.59     | 0.026050405    |
| VEGF signaling pathway                  | 8            | 0.95     | 0.029858231    |
| Adherens junction                       | 8            | 0.95     | 0.029858231    |
| B cell receptor signaling pathway       | 8            | 0.95     | 0.038047822    |
| Tight junction                          | 11           | 1.30     | 0.040569199    |
